# Supplementary material
Source: Springer Nature journal article supplement (https://www.springermedizin.de/resource/supplementary/12933_2014_833_MOESM2_ESM.pdf/9539346)

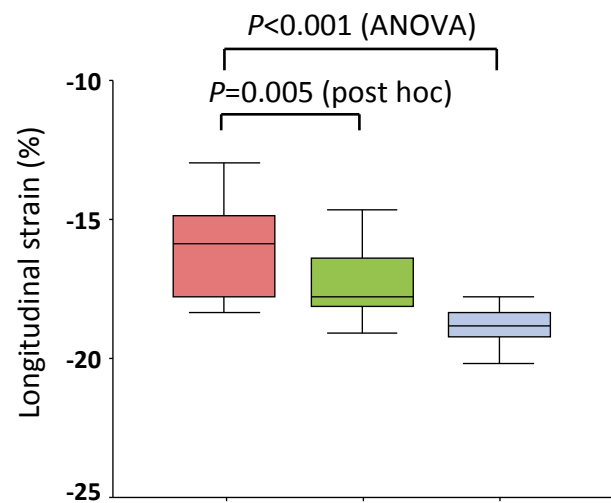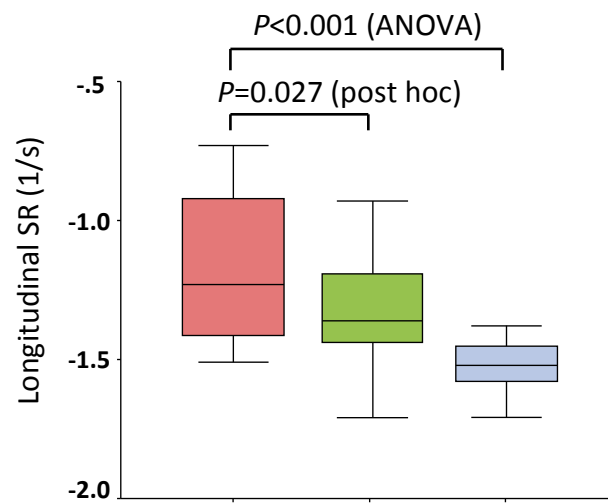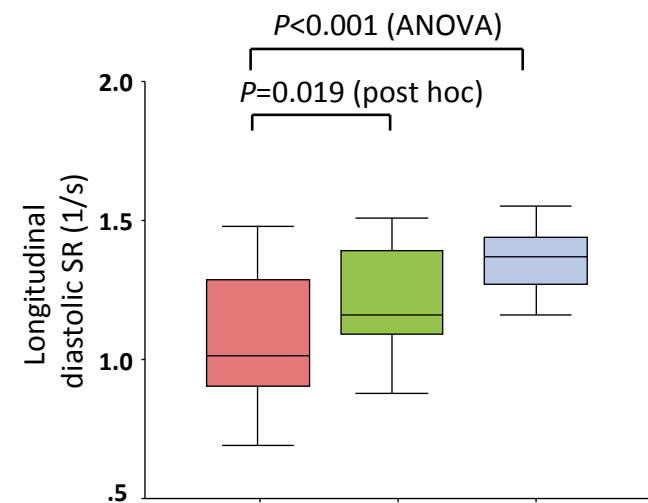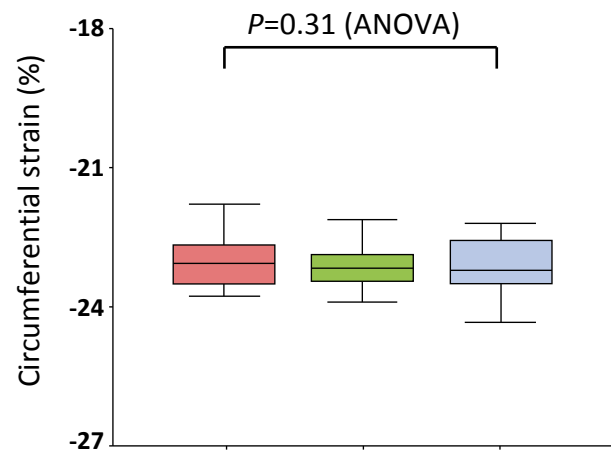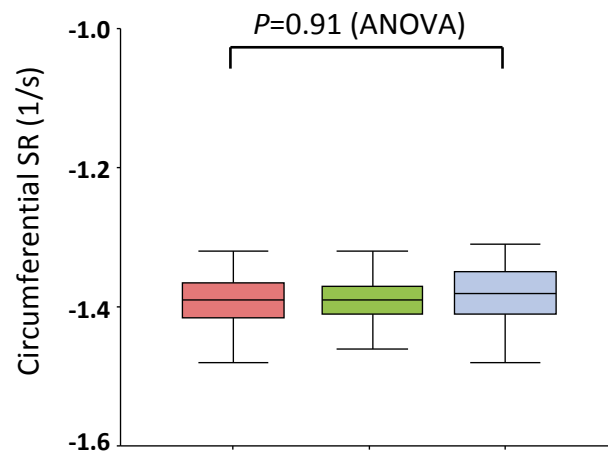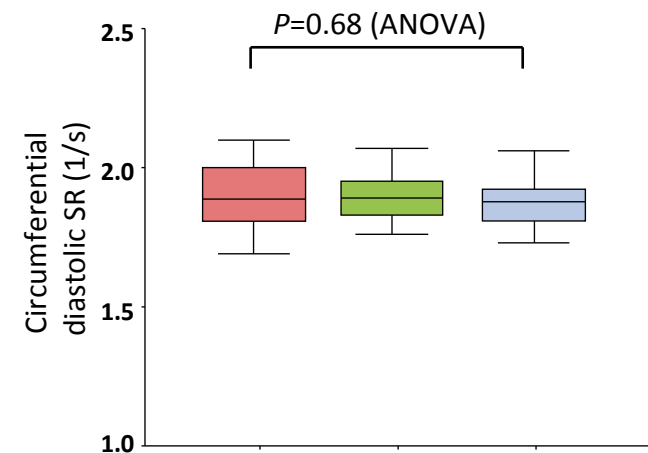

- AVS+IR Group (HOMA index > 1.80)
- AVS-IR Group (HOMA index  $\leq$  1.80)
- Control Group

Supplement: MOESM2 [file 9539346]
